# Supplementary material for: Locally produced leaf wax biomarkers in the high-altitude Areguni Mountains outweigh downstream transport
Source: Copernicus journal article supplement (doi:10.5194/bg-22-831-2025), 2025-02-18
Supplement: Supplementary file 1 [file bg-22-831-2025-supplement.zip]

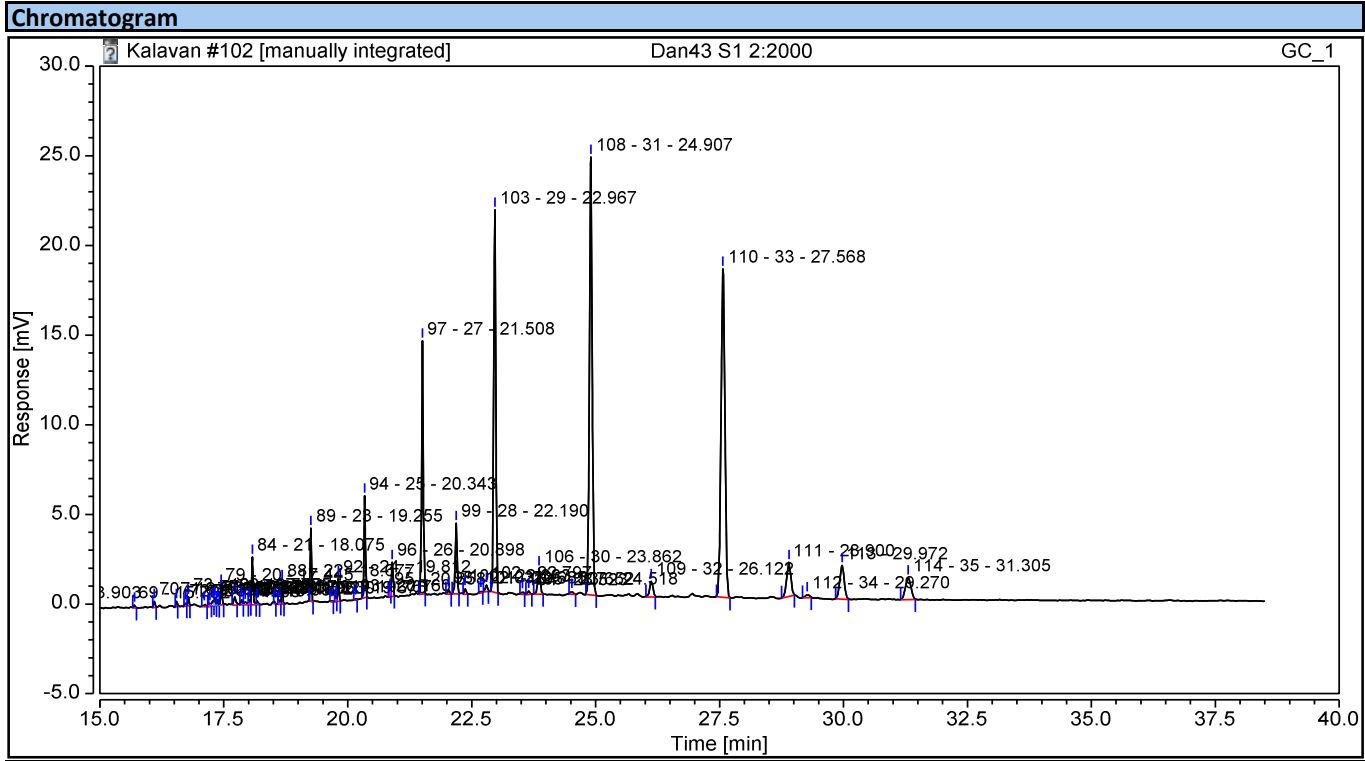


**Supplemental Figure 1**: Chromatogram of above treeline soil sample (Dan 43)


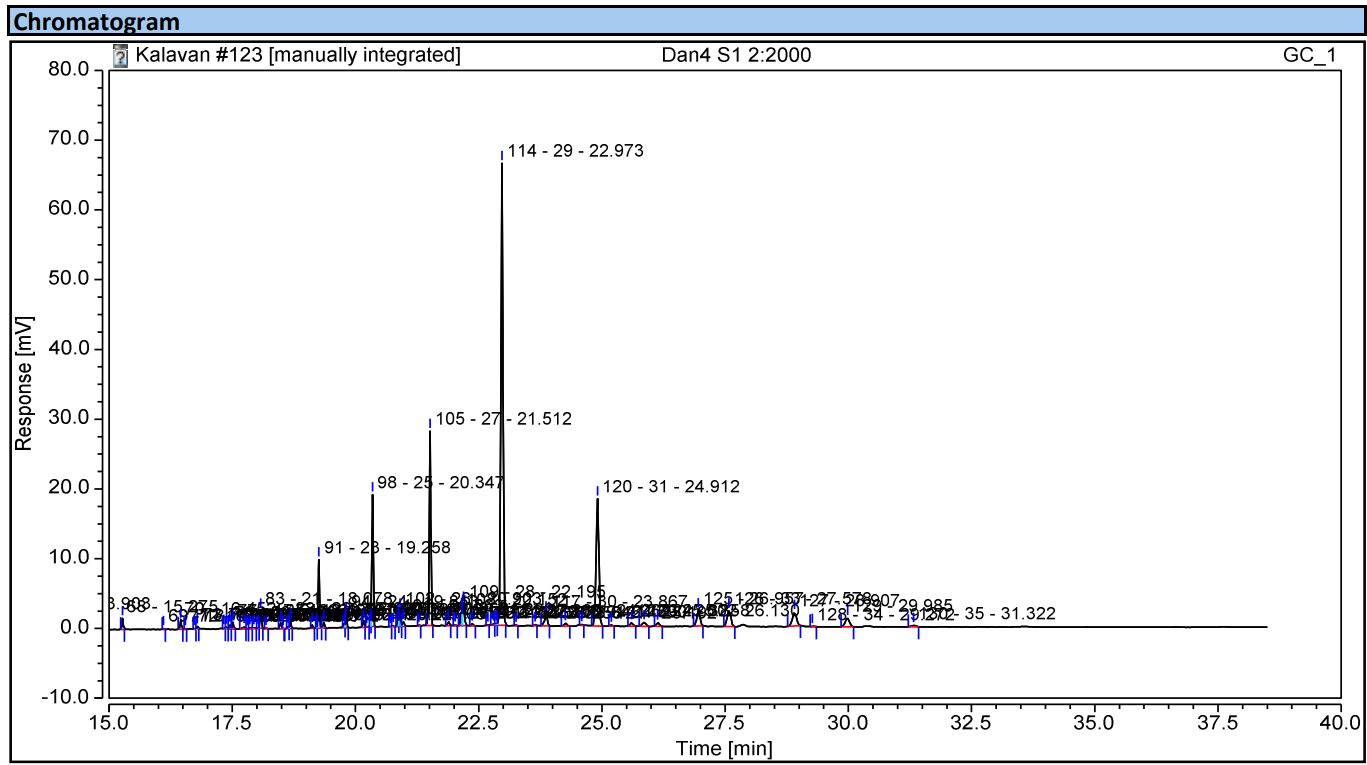


**Supplemental Figure 2**: Chromatogram of below treeline soil sample (Dan 4)


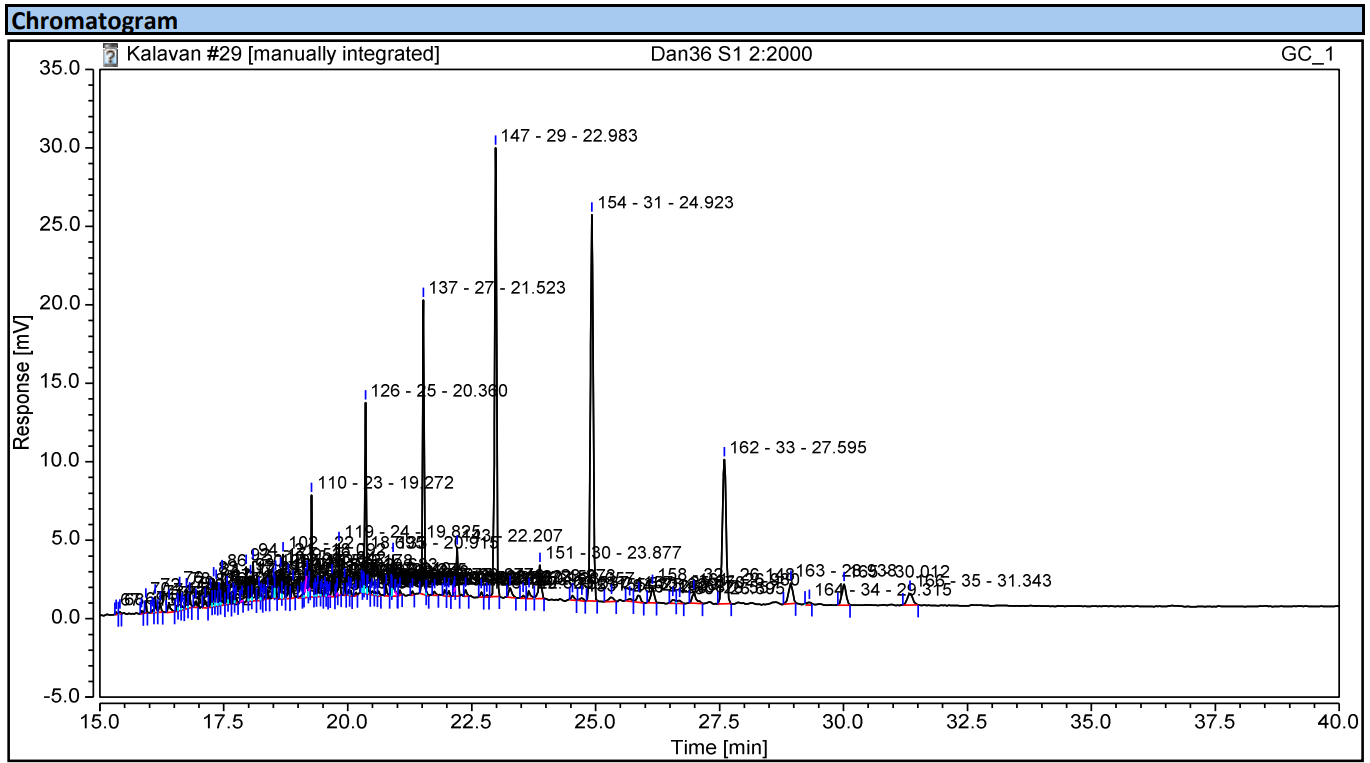


**Supplemental Figure 3**: Chromatogram of above treeline stream sample (Dan 36)


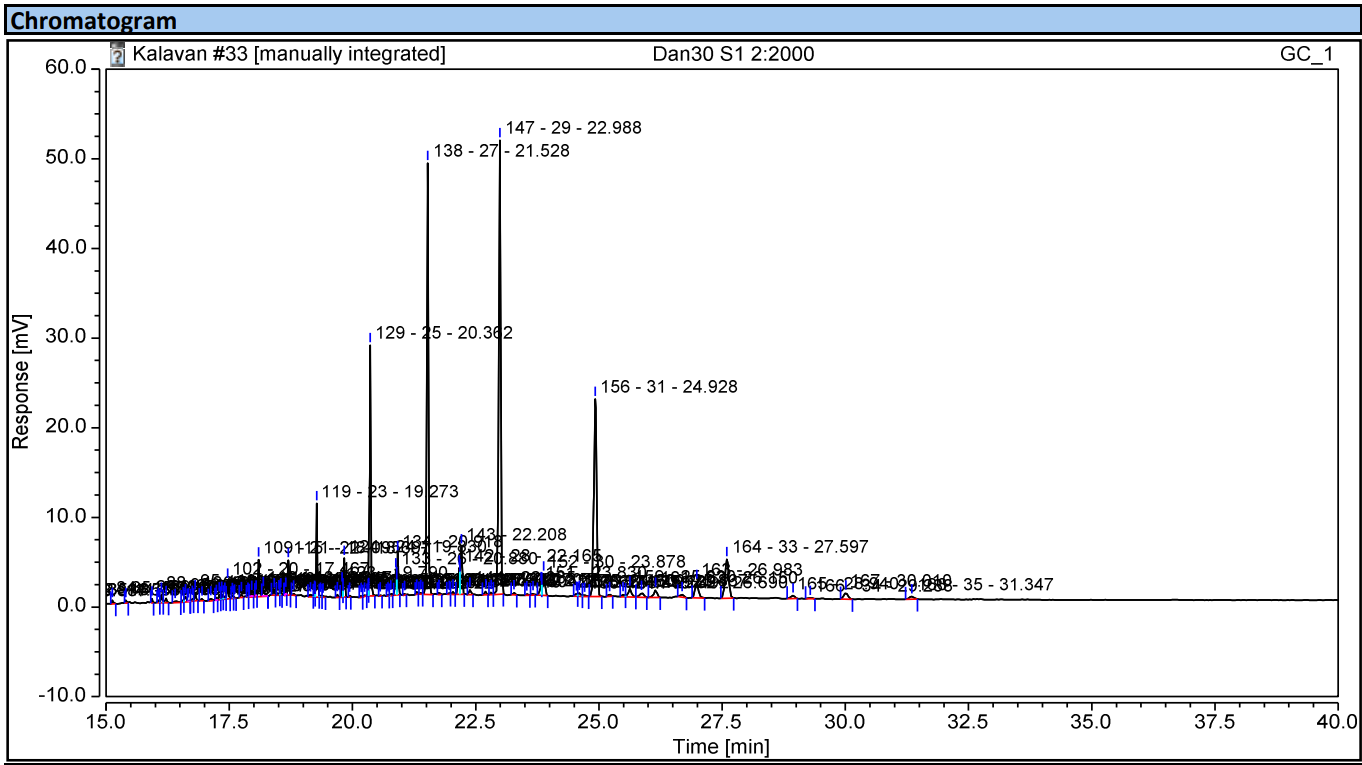


**Supplemental Figure 4**: Chromatogram of below treeline stream sample (Dan 30)
