# Supplementary material for: Locally produced leaf wax biomarkers in the high-altitude Areguni Mountains outweigh downstream transport
Source: Copernicus journal article supplement (doi:10.5194/bg-22-831-2025), 2025-02-18
Supplement: Supplementary file 1 [file bg-22-831-2025-supplement.zip]

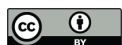

*Supplement of*

## **Locally produced leaf wax biomarkers in the high-altitude Areguni Mountains outweigh downstream transport**

**Alex Brittingham et al.**

*Correspondence to:* Alex Brittingham ([alexander.brittingham@mail.huji.ac.il](mailto:alexander.brittingham@mail.huji.ac.il))

- [bg-22-831-2025-supplement-title-page.pdf](#)
- Supplemental Material
  - [Supplemental Data.xlsx](#)
  - [Supplemental Figures.docx](#)

The copyright of individual parts of the supplement might differ from the article licence.
