# Supplementary material for: Locally produced leaf wax biomarkers in the high-altitude Areguni Mountains outweigh downstream transport
Source: Copernicus journal article supplement (doi:10.5194/bg-22-831-2025), 2025-02-18
Supplement: Supplementary file 2 [file Supplemental Data.xlsx]

## Sheet: Sample Data
ID	Number	Type	Treeline	Altitude (masl)	δ13C	δD	ACL	OEP	Paq
Dan 46	46	Soil	Above	2132.92	-34.3489	-171.58	30.1398	7.52267	0.0865623
Dan 35	35	Soil	Above	2165.32	-34.3567	-176.388	30.5208	10.1769	0.149782
Dan 12	12	Soil	Above	2185.61	-34.8827	-172.844	30.2603	11.1573	0.0612284
Dan 43	43	Soil	Above	2278.87	-35.0305	-174.683	30.8826	11.7015	0.0892109
Dan 41	41	Soil	Above	2281.6	-34.9595	-170.975	29.7548	8.32166	0.141312
Dan 37	37	Soil	Above	2362.75	-35.7028	-173.5	30.782	11.1704	0.0930096
Dan 38	38	Soil	Above	2402.42	-34.4797	-178.206	31.7598	15.2541	0.070303
Dan 16	16	Soil	Above	2428.46	-35.8765	-175.012	30.0349	11.4003	0.129931
Dan 14	14	Soil	Above	2428.76	-34.1943	-181.3	31.1198	16.2982	0.0958377
Dan 28	28	Soil	Below	1621.8	-33.2317	-148.6	29.7803	8.07168	0.126964
Dan 31	31	Soil	Below	1629.06	-34.1894	-155.276	30.2511	10.782	0.0498875
Dan 26	26	Soil	Below	1745.94	-34.3227	-155.3	30.1039	12.5307	0.139299
Dan 23	23	Soil	Below	1748.97	-32.3601	-155.422	28.4877	10.5814	0.22513
Dan 22	22	Soil	Below	1750.49	-33.1899	-153.191	29.6381	9.19318	0.180864
Dan 34	34	Soil	Below	1752.3	-34.1535	-152.687	30.2138	13.9578	0.0806538
Dan 7	7	Soil	Below	1849.5	-32.8455	-160.5	29.7235	7.92435	0.107041
Dan 32	32	Soil	Below	1852.23	-32.7825	-155.8	29.7578	7.7764	0.116109
Dan 51	51	Soil	Below	1856.77	-33.1073	-163.7	29.1444	9.45705	0.127354
Dan 3	3	Soil	Below	1902.8	-32.7067	-155.1	29.5059	9.86029	0.10648
Dan 10	10	Soil	Below	1906.43	-33.1539	-164.2	29.9662	10.334	0.132012
Dan 29	29	Soil	Below	1967.29	-32.835	-144.133	29.5923	7.35719	0.140474
Dan 9	9	Soil	Below	1976.68	-34.4879	-162.3	29.344	8.72337	0.119827
Dan 18	18	Soil	Below	2001.81	-33.5293	-153.8	28.922	14.7877	0.151775
Dan 19	19	Soil	Below	2003.02	-33.677	-156.55	28.9969	10.7612	0.237568
Dan 48	48	Soil	Below	2013.01	-32.2917	-152.9	29.4523	7.43314	0.128747
Dan 4	4	Soil	Below	2023.01	-32.7534	-154.5	28.3502	15.5574	0.34512
Dan 1	1	Soil	Below	2026.03	-33.6877	-155.627	29.5732	10.6798	0.117216
Dan 6	6	Soil	Below	2104.46	-33.3124	-163.5	28.7894	18.3637	0.239732
Dan 20	20	Soil	Below	2105.97	-33.961	-156.4	30.3858	10.706	0.0722016
Dan 25	25	Soil	Below	2184.7	-32.7659	-161.367	30.0023	14.7466	0.197644
Dan 47	47	Stream	Above	2094.77	-33.4964	-155.221	29.5075	9.46825	0.129713
Dan 44	44	Stream	Above	2161.99	-35.011	-170.801	29.0852	8.22955	0.137513
Dan 45	45	Stream	Above	2165.32	-35.8239	-174.676	29.4751	10.4212	0.0940268
Dan 36	36	Stream	Above	2181.98	-34.3946	-182.8	29.994	14.311	0.152484
Dan 42	42	Stream	Above	2271.91	-34.8703	-171.4	30.215	9.93845	0.128178
Dan 40	40	Stream	Above	2274.33	-35.0704	-175.021	29.8274	13.5016	0.160492
Dan 39	39	Stream	Above	2329.44	-35.0509	-178.636	29.5247	8.57522	0.127111
Dan 15	15	Stream	Above	2426.64	-35.0305	-184	29.4632	7.54431	0.131117
Dan 13	13	Stream	Above	2578.95	-35.9737	-181.7	30.2314	9.13444	0.108801
Dan 17	17	Stream	Below	1646.32	-33.9828	-151.392	30.0017	11.4213	0.106988
Dan 24	24	Stream	Below	1739.28	-33.7364	-155.367	29.5915	13.428	0.111513
Dan 21	21	Stream	Below	1748.67	-32.8205	-153.9	29.2985	16.7493	0.148188
Dan 27	27	Stream	Below	1842.84	-34.0504	-160.099	29.423	14.0289	0.119695
Dan 50	50	Stream	Below	1862.83	-33.5186	-163.5	29.3237	10.0505	0.0765781
Dan 2	2	Stream	Below	1905.52	-33.6518	-160.723	28.6024	10.373	0.24888
Dan 30	30	Stream	Below	1959.42	-33.7747	-149.7	28.7858	12.73	0.214378
Dan 49	49	Stream	Below	1994.24	-32.4854	-151.3	30.0004	11.2225	0.0519464
Dan 5	5	Stream	Below	2001.21	-32.9605	-154.5	29.149	15.1526	0.202204
Dan 33	33	Stream	Below	2023.31	-34.0572	-159.305	29.1338	9.81092	0.23531
Dan 8	8	Stream	Below	2103.25	-33.6211	-153.8	29.3258	11.6706	0.157953
Dan 11	11	Stream	Below	2183.79	-34.8594	-184.9	29.5822	8.57979	0.143676

## Sheet: Stream Model
				Stream Sample Measured Values					Alpine Meadow Constants						Deciduous Vegetation Constants						Calculated ACL Expectations			Calculated d13c Expectations			Calculated dD Expectations
Number	Type	Treeline	Altitude	d13c	dD	ACL	OEP	Paq	% Grass	Grass TAC	Grass NPP	Grass ACL	Grass δ13C	Grass dD	% Tree	Tree TAC	Tree npp	Tree ACL	Tree d13C	Tree dD	Area	Area+TAC	Area+TAC+NPP	Area	Area+TAC	Area+TAC+NPP	Area	Area+TAC	Area+TAC+NPP
17	Stream	Below	1646.32	-33.9828	-151.392	30.0017	11.4213	0.106988	52	3.03	719.1	30.6	-34.9	-175	48	7.69	1099.4	29.5	-33.3	-156	30.072	29.8291	29.7401	-34.132	-33.7787	-33.6492	-165.88	-161.684	-160.147
24	Stream	Below	1739.28	-33.7364	-155.367	29.5915	13.428	0.111513	62.6	3.03	719.1	30.6	-34.9	-175	37.4	7.69	1099.4	29.5	-33.3	-156	30.1886	29.9372	29.8315	-34.3016	-33.9359	-33.7822	-167.894	-163.551	-161.726
21	Stream	Below	1748.67	-32.8205	-153.9	29.2985	16.7493	0.148188	53.9	3.03	719.1	30.6	-34.9	-175	46.1	7.69	1099.4	29.5	-33.3	-156	30.0929	29.8469	29.7547	-34.1624	-33.8046	-33.6705	-166.241	-161.992	-160.4
27	Stream	Below	1842.84	-34.0504	-160.099	29.423	14.0289	0.119695	70.4	3.03	719.1	30.6	-34.9	-175	29.6	7.69	1099.4	29.5	-33.3	-156	30.2744	30.0321	29.918	-34.4264	-34.074	-33.908	-169.376	-165.192	-163.22
50	Stream	Below	1862.83	-33.5186	-163.5	29.3237	10.0505	0.0765781	57.4	3.03	719.1	30.6	-34.9	-175	42.6	7.69	1099.4	29.5	-33.3	-156	30.1314	29.8815	29.7835	-34.2184	-33.8549	-33.7124	-166.906	-162.589	-160.897
2	Stream	Below	1905.52	-33.6518	-160.723	28.8	10.373	0.24888	68.5	3.03	719.1	30.6	-34.9	-175	31.5	7.69	1099.4	29.5	-33.3	-156	30.2535	30.0076	29.8951	-34.396	-34.0383	-33.8746	-169.015	-164.768	-162.824
30	Stream	Below	1959.42	-33.7747	-149.7	28.7858	12.73	0.214378	56.7	3.03	719.1	30.6	-34.9	-175	43.3	7.69	1099.4	29.5	-33.3	-156	30.1237	29.8744	29.7776	-34.2072	-33.8446	-33.7037	-166.773	-162.467	-160.794
49	Stream	Below	1994.24	-32.4854	-151.3	30.0004	11.2225	0.0519464	79.6	3.03	719.1	30.6	-34.9	-175	20.4	7.69	1099.4	29.5	-33.3	-156	30.3756	30.1665	30.0515	-34.5736	-34.2694	-34.1022	-171.124	-167.512	-165.527
5	Stream	Below	2001.21	-32.9605	-154.5	29.149	15.1526	0.202204	80.7	3.03	719.1	30.6	-34.9	-175	19.3	7.69	1099.4	29.5	-33.3	-156	30.3877	30.1845	30.0705	-34.5912	-34.2957	-34.1299	-171.333	-167.823	-165.855
33	Stream	Below	2023.31	-34.0572	-159.305	29.1338	9.81092	0.23531	68.3	3.03	719.1	30.6	-34.9	-175	31.7	7.69	1099.4	29.5	-33.3	-156	30.2513	30.0051	29.8927	-34.3928	-34.0346	-33.8712	-168.977	-164.724	-162.784
47	Stream	Above	2094.77	-33.4964	-155.221	29.5075	9.46825	0.129713	100	3.03	719.1	30.6	-34.9	-175	0	7.69	1099.4	29.5	-33.3	-156	30.6	30.6	30.6	-34.9	-34.9	-34.9	-175	-175	-175
8	Stream	Below	2103.25	-33.6211	-153.8	29.3258	11.6706	0.157953	91.9	3.03	719.1	30.6	-34.9	-175	8.1	7.69	1099.4	29.5	-33.3	-156	30.5109	30.3989	30.3197	-34.7704	-34.6075	-34.4923	-173.461	-171.527	-170.158
44	Stream	Above	2161.99	-35.011	-170.801	29.0852	8.22955	0.137513	99.8	3.03	719.1	30.6	-34.9	-175	0.2	7.69	1099.4	29.5	-33.3	-156	30.5978	30.5944	30.5915	-34.8968	-34.8919	-34.8877	-174.962	-174.904	-174.853
45	Stream	Above	2165.32	-35.8239	-174.676	29.4751	10.4212	0.0940268	100	3.03	719.1	30.6	-34.9	-175	0	7.69	1099.4	29.5	-33.3	-156	30.6	30.6	30.6	-34.9	-34.9	-34.9	-175	-175	-175
36	Stream	Above	2181.98	-34.3946	-182.8	29.994	14.311	0.152484	100	3.03	719.1	30.6	-34.9	-175	0	7.69	1099.4	29.5	-33.3	-156	30.6	30.6	30.6	-34.9	-34.9	-34.9	-175	-175	-175
11	Stream	Below	2183.79	-34.8594	-184.9	29.5822	8.57979	0.143676	97.4	3.03	719.1	30.6	-34.9	-175	2.6	7.69	1099.4	29.5	-33.3	-156	30.5714	30.5302	30.4968	-34.8584	-34.7985	-34.7498	-174.506	-173.794	-173.217
42	Stream	Above	2271.91	-34.8703	-171.4	30.215	9.93845	0.128178	100	3.03	719.1	30.6	-34.9	-175	0	7.69	1099.4	29.5	-33.3	-156	30.6	30.6	30.6	-34.9	-34.9	-34.9	-175	-175	-175
40	Stream	Above	2274.33	-35.0704	-175.021	29.8274	13.5016	0.160492	100	3.03	719.1	30.6	-34.9	-175	0	7.69	1099.4	29.5	-33.3	-156	30.6	30.6	30.6	-34.9	-34.9	-34.9	-175	-175	-175
39	Stream	Above	2329.44	-35.0509	-178.636	29.5247	8.57522	0.127111	100	3.03	719.1	30.6	-34.9	-175	0	7.69	1099.4	29.5	-33.3	-156	30.6	30.6	30.6	-34.9	-34.9	-34.9	-175	-175	-175
15	Stream	Above	2426.64	-35.0305	-184	29.4632	7.54431	0.131117	100	3.03	719.1	30.6	-34.9	-175	0	7.69	1099.4	29.5	-33.3	-156	30.6	30.6	30.6	-34.9	-34.9	-34.9	-175	-175	-175
13	Stream	Above	2578.95	-35.9737	-181.7	30.2314	9.13444	0.108801	100	3.03	719.1	30.6	-34.9	-175	0	7.69	1099.4	29.5	-33.3	-156	30.6	30.6	30.6	-34.9	-34.9	-34.9	-175	-175	-175
